# Supplementary material
Source: PubMed Central journal article supplement (PMC2917718)
Supplement: mmc1.pdf [file mmc1.pdf]

American Journal of Human Genetics, Volume 87

## **Supplemental Data**

# **Whole-Genome Genetic Diversity in a Sample of Australians with Deep Aboriginal Ancestry**

Brian P. McEvoy, Joanne M. Lind, Eric T. Wang, Robert K. Moyzis, Peter M. Visscher,  
Sheila M. van Holst Pellekaan, and Alan N. Wilton

# A. *frappe*

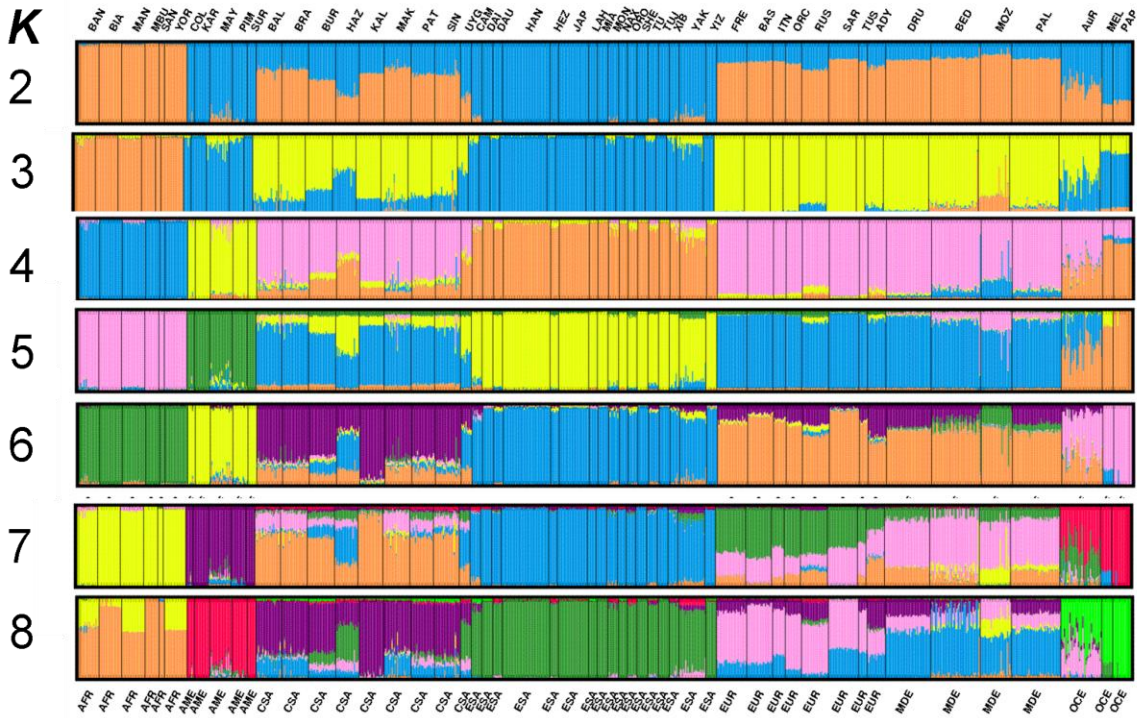

# B. STRUCTURE

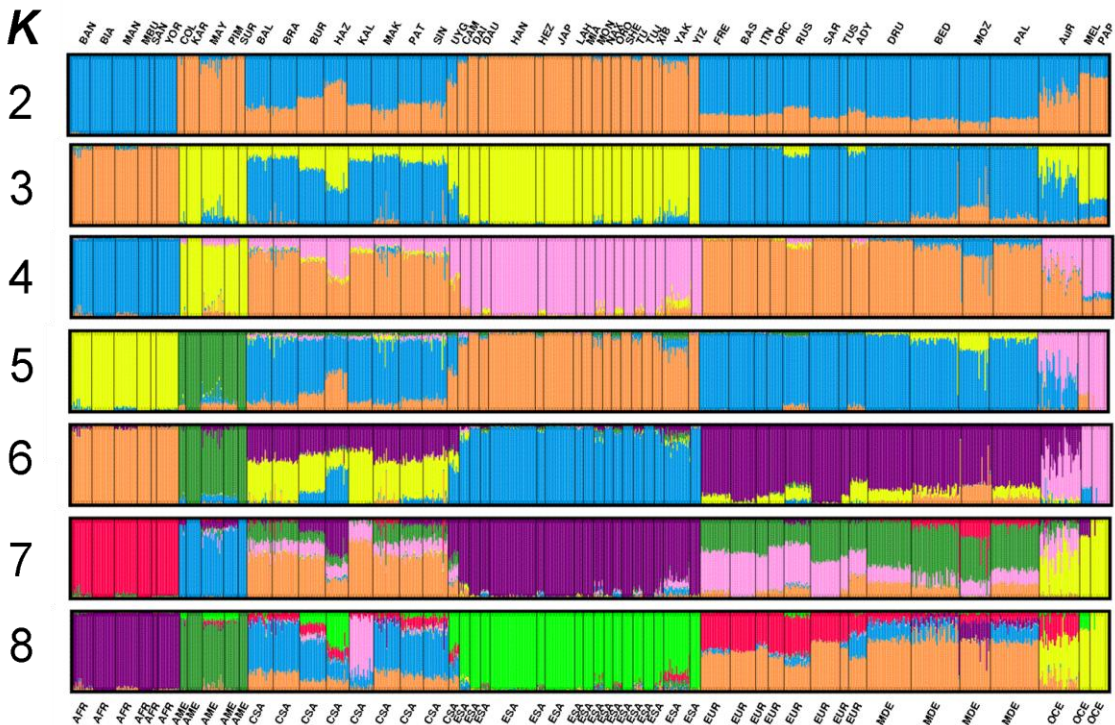

**Figure S1**– Individual ancestry proportions in the HGDP and Aboriginal Australians (AuR) population samples, estimated by **(A)** *frappe*, using all 155,166 autosomal markers and **(B)**

STRUCTURE analysis, using a one-tenth subset (15,516) of all autosomal SNPs. Each vertical line represents an individual and is divided into  $K$  (number of population clusters) coloured segments reflecting the estimated ancestry proportion from each cluster. Different geographic samples are divided by black lines with population and region indicated above and below the plot respectively. See **Supplementary Table 2** for an explanation of population codes. *frappe* runs used 5,000 EM iterations while STRUCTURE runs were conducted under the admixture model with a 25,000 replicate burn-in followed by 25,000 MCMC iterations.

| <b>Population</b>                                    | <b>Population Code</b> | <b>Sample Size</b> |
|------------------------------------------------------|------------------------|--------------------|
| African ancestry in Southwest USA                    | ASW                    | 49                 |
| Utah residents with North and West European ancestry | CEU                    | 112                |
| Han Chinese in Beijing, China                        | CHB                    | 84                 |
| Chinese in Metropolitan Denver, Colorado             | CHD                    | 85                 |
| Gujarati Indians in Houston, Texas                   | GIH                    | 88                 |
| Japanese in Tokyo, Japan                             | JPT                    | 86                 |
| Luhya in Webuye, Kenya                               | LWK                    | 90                 |
| Mexican ancestry in Los Angeles, California          | MEX                    | 50                 |
| Maasai in Kinyawa, Kenya                             | MKK                    | 143                |
| Toscani in Italia                                    | TSI                    | 88                 |
| Yoruba in Ibadan, Nigeria                            | YRI                    | 113                |
|                                                      |                        |                    |

**Table S1** – HapMap3 Dataset

| Population     | Population Code | Region                    | Region Code | Sample Size |
|----------------|-----------------|---------------------------|-------------|-------------|
| Bantu          | BNE             | AFRICA                    | AFR         | 19          |
| Biaka Pygmies  | BIA             | AFRICA                    | AFR         | 21          |
| Mandenka       | MAN             | AFRICA                    | AFR         | 22          |
| Mbuti Pygmies  | MBU             | AFRICA                    | AFR         | 13          |
| San            | SAN             | AFRICA                    | AFR         | 5           |
| Yoruba         | YOR             | AFRICA                    | AFR         | 21          |
|                |                 | <b>AFRICA TOTAL</b>       |             | <b>101</b>  |
| Colombian      | COL             | AMERICA                   | AME         | 7           |
| Karitiana      | KAR             | AMERICA                   | AME         | 14          |
| Maya           | MAY             | AMERICA                   | AME         | 21          |
| Pima           | PIM             | AMERICA                   | AME         | 14          |
| Surui          | SUR             | AMERICA                   | AME         | 8           |
|                |                 | <b>AMERICA TOTAL</b>      |             | <b>64</b>   |
| Balochi        | BAL             | CENTRAL/SOUTH_ASIA        | CSA         | 24          |
| Brahui         | BRA             | CENTRAL/SOUTH_ASIA        | CSA         | 25          |
| Burusho        | BUR             | CENTRAL/SOUTH_ASIA        | CSA         | 25          |
| Hazara         | HAZ             | CENTRAL/SOUTH_ASIA        | CSA         | 22          |
| Kalash         | KAL             | CENTRAL/SOUTH_ASIA        | CSA         | 23          |
| Makrani        | MAK             | CENTRAL/SOUTH_ASIA        | CSA         | 25          |
| Pathan         | PAT             | CENTRAL/SOUTH_ASIA        | CSA         | 22          |
| Sindhi         | SIN             | CENTRAL/SOUTH_ASIA        | CSA         | 24          |
| Uyгур          | UYG             | CENTRAL/SOUTH_ASIA        | CSA         | 10          |
|                |                 | <b>CENTRAL/SOUTH_ASIA</b> |             | <b>200</b>  |
| Cambodian      | CAM             | EAST-ASIA                 | ESA         | 10          |
| Dai            | DAI             | EAST-ASIA                 | ESA         | 10          |
| Daur           | DAU             | EAST-ASIA                 | ESA         | 9           |
| Druze          | DRU             | EAST-ASIA                 | ESA         | 42          |
| Han            | HAN             | EAST-ASIA                 | ESA         | 44          |
| Hezhen         | HEZ             | EAST-ASIA                 | ESA         | 8           |
| Japanese       | JAP             | EAST-ASIA                 | ESA         | 28          |
| Lahu           | LAH             | EAST-ASIA                 | ESA         | 8           |
| Miaozu         | MIA             | EAST-ASIA                 | ESA         | 10          |
| Mongola        | MON             | EAST-ASIA                 | ESA         | 10          |
| Naxi           | NAX             | EAST-ASIA                 | ESA         | 8           |
| Oroqen         | ORO             | EAST-ASIA                 | ESA         | 9           |
| She            | SHE             | EAST-ASIA                 | ESA         | 10          |
| Tu             | TU              | EAST-ASIA                 | ESA         | 10          |
| Tujia          | TUJ             | EAST-ASIA                 | ESA         | 10          |
| Xibo           | XIB             | EAST-ASIA                 | ESA         | 9           |
| Yakut          | YAK             | EAST-ASIA                 | ESA         | 25          |
| Yizu           | YIZ             | EAST-ASIA                 | ESA         | 10          |
|                |                 | <b>EAST ASIA TOTAL</b>    |             | <b>270</b>  |
| Adygei         | ADY             | EUROPE                    | EUR         | 17          |
| French         | FRE             | EUROPE                    | EUR         | 28          |
| French Basque  | BAS             | EUROPE                    | EUR         | 24          |
| North Italian  | ITN             | EUROPE                    | EUR         | 12          |
| Orcadian       | ORC             | EUROPE                    | EUR         | 15          |
| Russian        | RUS             | EUROPE                    | EUR         | 25          |
| Sardinian      | SAR             | EUROPE                    | EUR         | 28          |
| Tuscan         | TUS             | EUROPE                    | EUR         | 8           |
|                |                 | <b>EUROPE TOTAL</b>       |             | <b>157</b>  |
| Bedouin        | BED             | MIDDLE-EAST               | MDE         | 46          |
| Mozabite       | MOZ             | MIDDLE-EAST               | MDE         | 29          |
| Palestinian    | PAL             | MIDDLE-EAST               | MDE         | 46          |
|                |                 | <b>MIDDLE-EAST TOTAL</b>  |             | <b>121</b>  |
| NAN Melanesian | MEL             | OCEANIA                   | OCE         | 10          |
| Papuan         | PAP             | OCEANIA                   | OCE         | 17          |
|                |                 | <b>OCEANIA TOTAL</b>      |             | <b>27</b>   |

Table S2 - HGDP Dataset

| SNP ID     | Chromosome | NCBI 36 Position | F <sub>ST</sub> (HM3 versus AuR) |
|------------|------------|------------------|----------------------------------|
| rs324425   | 1          | 46653940         | 0.769952262                      |
| rs486706   | 1          | 57315371         | 0.691178832                      |
| rs17095579 | 1          | 74799846         | 0.674039353                      |
| rs17109273 | 1          | 83065455         | 0.693082651                      |
| rs10914054 | 1          | 178858423        | 0.858421486                      |
| rs12026494 | 1          | 207161387        | 0.74969442                       |
| rs12124089 | 1          | 214993567        | 0.806406762                      |
| rs16847561 | 1          | 225536172        | 0.694384985                      |
| rs6541321  | 1          | 228750799        | 0.678118368                      |
| rs10180540 | 2          | 57803608         | 0.659604282                      |
| rs4671871  | 2          | 68139145         | 0.671381176                      |
| rs10520235 | 2          | 79382202         | 0.672881307                      |
| rs13031410 | 2          | 103891273        | 0.662861477                      |
| rs1074886  | 2          | 230945817        | 0.653205133                      |
| rs10510663 | 3          | 35534244         | 0.667696526                      |
| rs12715516 | 3          | 57670241         | 0.673383903                      |
| rs16835687 | 3          | 125809937        | 0.650544073                      |
| rs6806485  | 3          | 156852784        | 0.729718386                      |
| rs4679883  | 3          | 161608297        | 0.770338402                      |
| rs11946368 | 4          | 4990324          | 0.651234629                      |
| rs12512962 | 4          | 25504356         | 0.691136015                      |
| rs17713792 | 4          | 71189199         | 0.723171145                      |
| rs13151168 | 4          | 106155819        | 0.733525876                      |
| rs244044   | 4          | 111446758        | 0.658708408                      |
| rs4466024  | 4          | 154679865        | 0.693886898                      |
| rs26878    | 5          | 4956383          | 0.66742965                       |
| rs10520827 | 5          | 15929687         | 0.717467992                      |
| rs2455206  | 5          | 28292633         | 0.667172593                      |
| rs4242264  | 5          | 36451181         | 0.738400712                      |
| rs6897035  | 5          | 56030704         | 0.651158532                      |
| rs2640715  | 5          | 64709498         | 0.683179883                      |
| rs1043526  | 5          | 67630080         | 0.757287922                      |
| rs17335290 | 5          | 94226564         | 0.674099082                      |
| rs3792884  | 5          | 131679160        | 0.655199786                      |
| rs17287322 | 5          | 141824272        | 0.669501492                      |
| rs10516081 | 5          | 170645136        | 0.667959186                      |
| rs10484347 | 6          | 14121739         | 0.684794609                      |
| rs1459047  | 6          | 21308369         | 0.673047531                      |
| rs853884   | 6          | 36576111         | 0.741335048                      |
| rs16885425 | 6          | 54508750         | 0.667696526                      |
| rs9363705  | 6          | 67933518         | 0.66108951                       |
| rs6941356  | 6          | 88024355         | 0.695536842                      |
| rs3734193  | 6          | 90133404         | 0.74640639                       |

|            |    |           |             |
|------------|----|-----------|-------------|
| rs10484828 | 6  | 144077122 | 0.669072986 |
| rs17077242 | 6  | 148056993 | 0.76007467  |
| rs6977948  | 7  | 13605417  | 0.655912619 |
| rs4722596  | 7  | 26457759  | 0.799333187 |
| rs7801956  | 7  | 55181937  | 0.646216169 |
| rs10266293 | 7  | 94571571  | 0.69409234  |
| rs2041001  | 7  | 107870335 | 0.747406223 |
| rs17544734 | 7  | 116899358 | 0.704465673 |
| rs17076075 | 8  | 5969264   | 0.650616844 |
| rs17749155 | 8  | 10105483  | 0.650823365 |
| rs7846685  | 8  | 16906553  | 0.739345744 |
| rs17818622 | 8  | 25944469  | 0.711027259 |
| rs17211259 | 8  | 64486476  | 0.672089445 |
| rs13282976 | 8  | 84592073  | 0.686296779 |
| rs4242384  | 8  | 128587736 | 0.686985451 |
| rs17587374 | 8  | 137814753 | 0.692825807 |
| rs17797668 | 8  | 140696013 | 0.709712033 |
| rs10810132 | 9  | 14328470  | 0.684466745 |
| rs17801563 | 9  | 81653626  | 0.736065991 |
| rs2766996  | 9  | 112727548 | 0.686305027 |
| rs1144522  | 10 | 29421508  | 0.663406457 |
| rs282689   | 10 | 60326415  | 0.661241795 |
| rs35662    | 10 | 80158207  | 0.696238141 |
| rs17330985 | 10 | 89972718  | 0.825578335 |
| rs1982199  | 10 | 92899015  | 0.726444523 |
| rs10509685 | 10 | 97011379  | 0.691527233 |
| rs1889301  | 10 | 111647838 | 0.707662689 |
| rs3895063  | 11 | 745659    | 0.782366902 |
| rs1911627  | 11 | 7173601   | 0.655265962 |
| rs11606785 | 11 | 19987006  | 0.76757936  |
| rs1509595  | 11 | 24567047  | 0.729253135 |
| rs728633   | 11 | 27738555  | 0.657009315 |
| rs17284675 | 11 | 96778653  | 0.693366005 |
| rs17510714 | 12 | 31997716  | 0.748527377 |
| rs11172790 | 12 | 57555007  | 0.760418076 |
| rs11831622 | 12 | 70518453  | 0.799107108 |
| rs6561323  | 13 | 46083602  | 0.751442693 |
| rs12585139 | 13 | 48247271  | 0.844889801 |
| rs10140911 | 14 | 23985223  | 0.729396161 |
| rs12882445 | 14 | 79918202  | 0.743789187 |
| rs10141420 | 14 | 96385663  | 0.658167355 |
| rs8036639  | 15 | 96536631  | 0.697604607 |
| rs11645952 | 16 | 3312482   | 0.697293702 |
| rs4619385  | 16 | 21035675  | 0.656275393 |
| rs17210989 | 16 | 53730595  | 0.731035465 |
| rs727108   | 17 | 44669714  | 0.675587278 |

|            |    |          |             |
|------------|----|----------|-------------|
| rs1991549  | 17 | 49927285 | 0.669404213 |
| rs9908046  | 17 | 50918781 | 0.828609677 |
| rs722168   | 17 | 53267969 | 0.692551181 |
| rs9909857  | 17 | 62347107 | 0.873656696 |
| rs12458349 | 18 | 58505190 | 0.890010967 |
| rs12953809 | 18 | 73087637 | 0.672790434 |
| rs6030465  | 20 | 40836112 | 0.656716452 |
| rs6071491  | 20 | 59117976 | 0.716495841 |
| rs2826174  | 21 | 20619946 | 0.667082883 |
| rs10482931 | 21 | 23199934 | 0.645946823 |
| rs2838019  | 21 | 41643654 | 0.694348989 |

---

**Table S3** – Oceania Ancestry Informative Markers (AIMs)
